# Supplementary material for: Ultrathin 2D IZO film transistors printed via liquid InZn alloys: insights into the oxidation behavior and enhanced mobility properties
Source: Royal Society of Chemistry journal article supplement (doi:10.1039/d4tc02312a), 2024-01-01
Supplement: d4tc02312a1.pdf [file d4tc02312a1.pdf]

## Supporting information

# Ultrathin 2D IZO Film Transistor Printed via Liquid InZn Alloy: Insights into the Oxidation Behavior and Enhanced Mobility Properties

*Shanhao Ze*<sup>a,b</sup>, *Fei Li*<sup>a,b</sup>, *Jiaming Guo*<sup>a,b</sup>, *Cong Luo*<sup>a,b</sup>, *Tongxiang Chen*<sup>a,b</sup>, *Yan Tian*<sup>b,c</sup>, *Fei Liu*<sup>c,\*</sup>, *Jing Li*<sup>a,b,\*</sup> and *Baodan Liu*<sup>a,b,\*</sup>

<sup>a</sup>School of Materials Science and Engineering, Northeastern University, No. 11, Wenhua Road, Shenyang, 110819, China

<sup>b</sup>Foshan Graduate School of Innovation, Northeastern University, No. 2, Zhihui Road, Shunde District, Foshan, 528300, China

<sup>c</sup>State Key Laboratory of Optoelectronic Materials and Technologies, School of Electronics and Information Technology, Sun Yat-sen University, Guangzhou 510275, China

\* Corresponding Author: [liufei@mail.sysu.edu.cn](mailto:liufei@mail.sysu.edu.cn); [lijing1@mail.neu.edu.cn](mailto:lijing1@mail.neu.edu.cn); [baodanliu@hotmail.com](mailto:baodanliu@hotmail.com)

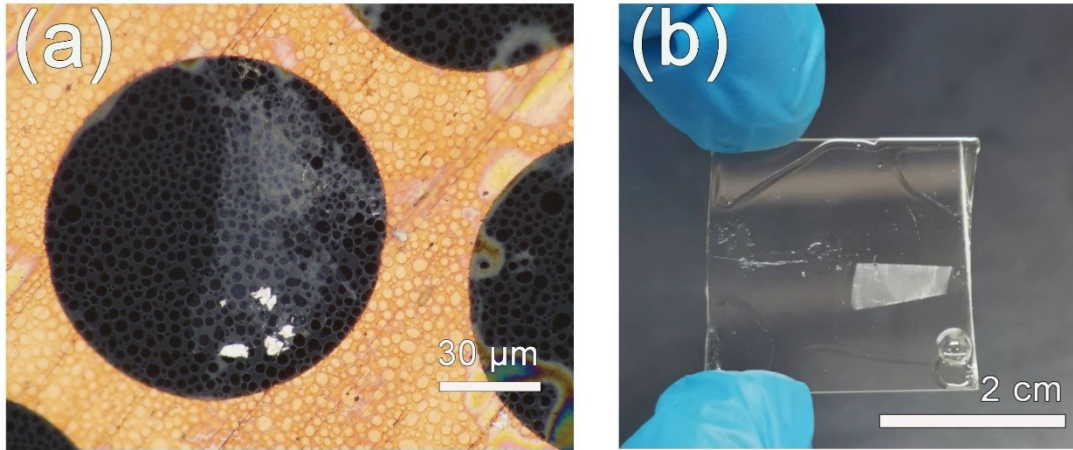

**Fig. S1** (a) 2D IZO films on TEM grid, (b) IZO films adhered with photoresist on quartz glass.

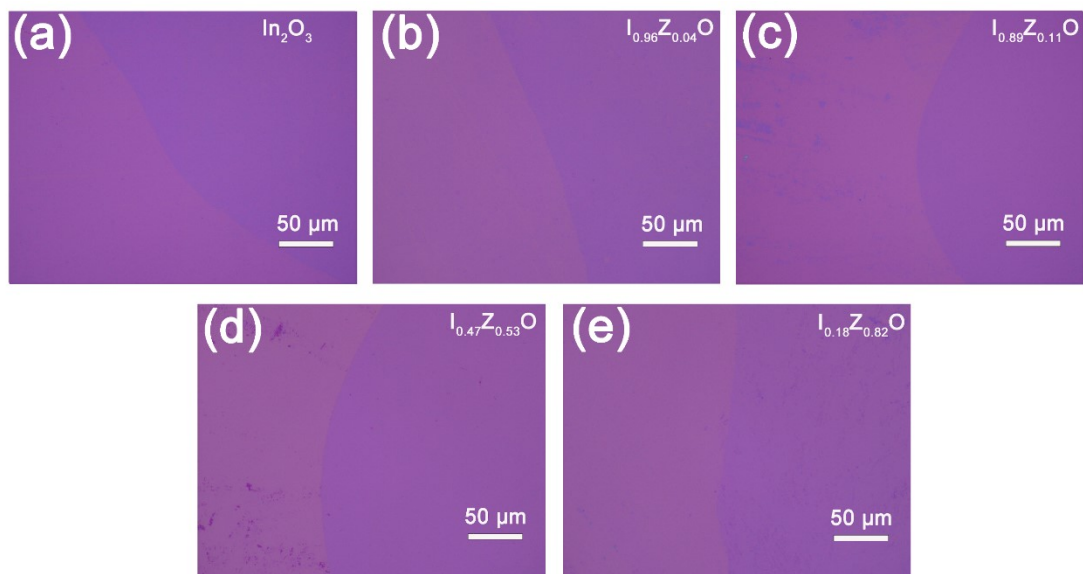

**Fig. S2** Optical images of (a)  $\text{In}_2\text{O}_3$ , (b)  $\text{I}_{0.96}\text{Z}_{0.04}\text{O}$ , (c)  $\text{I}_{0.89}\text{Z}_{0.11}\text{O}$ , (d)  $\text{I}_{0.47}\text{Z}_{0.53}\text{O}$  and (e)  $\text{I}_{0.18}\text{Z}_{0.82}\text{O}$  films.

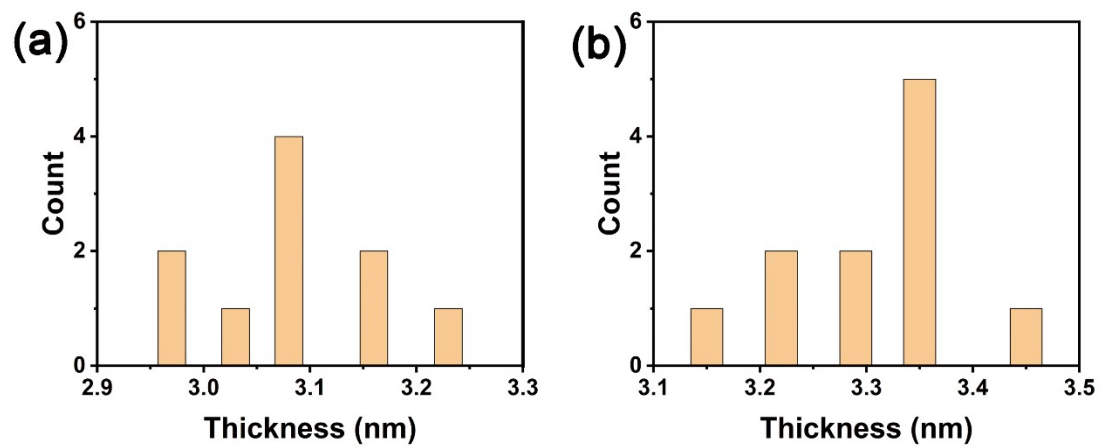

**Fig. S3** Statistical distribution of layer thicknesses of In<sub>2</sub>O<sub>3</sub> and IZO over ten samples each.

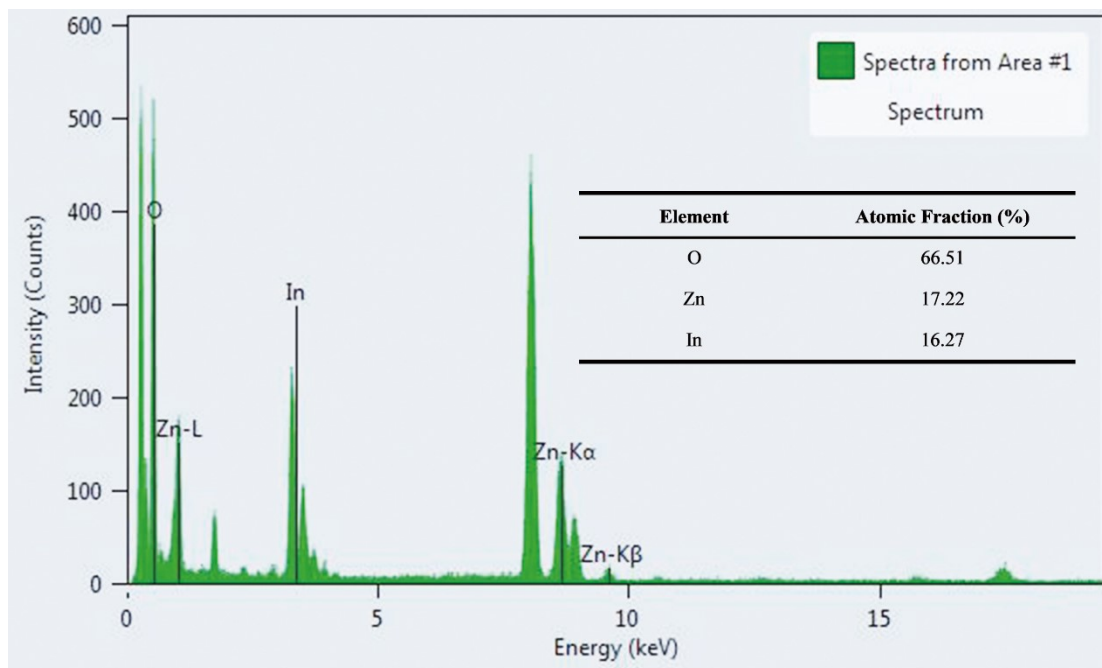

**Fig. S4** TEM-EDS spectrum of  $I_{0.47}Z_{0.53}O$ .

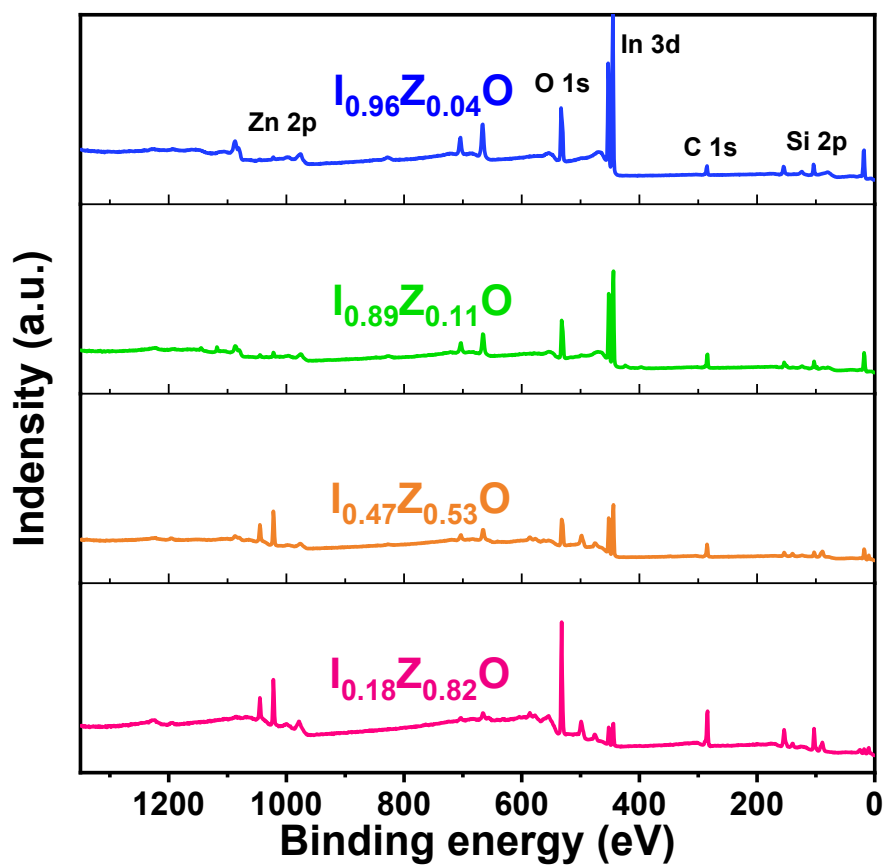

Fig. S5 XPS survey spectra of 2D IZO films with different content of Zn.

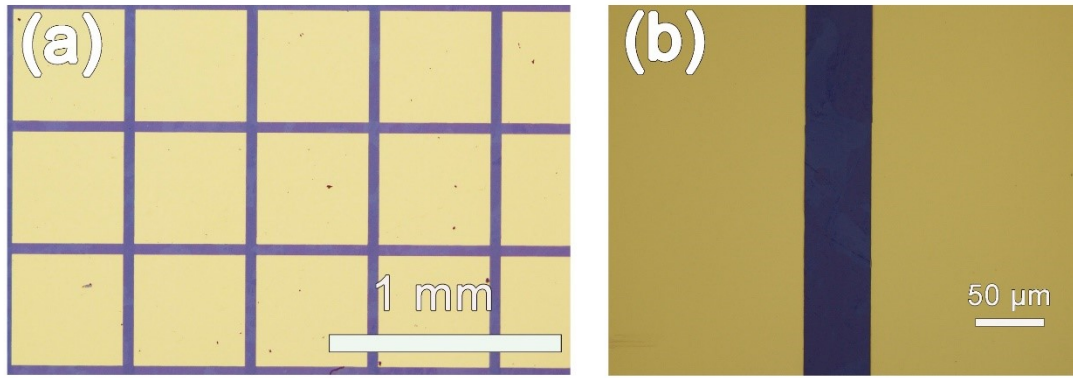

**Fig. S6** Periodic rectangular patterns of two-dimensional IZO films prepared by pulsed laser deposition on  $\text{SiO}_2$  substrates.

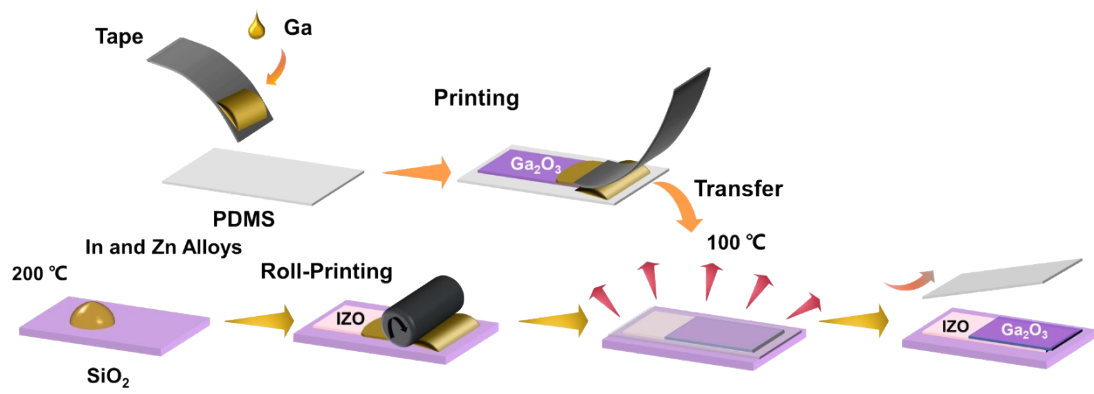

**Fig. S7** Detailed process schematic for preparing IZO/Ga<sub>2</sub>O<sub>3</sub> thin films using liquid In-Zn alloy and liquid Ga.



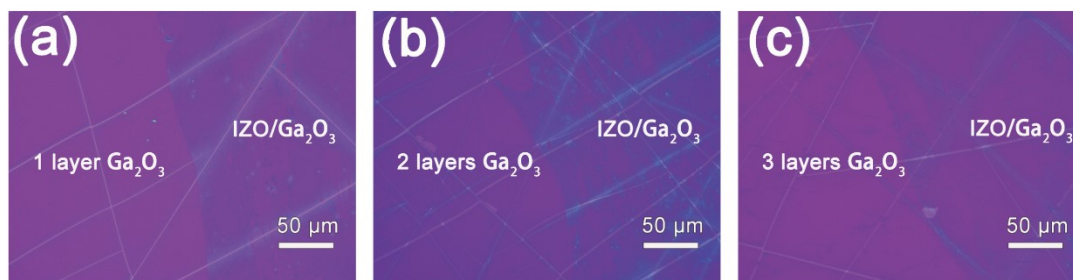

**Fig. 8** (a-c) Optical images of Ga<sub>2</sub>O<sub>3</sub> layers with different numbers of layers covering IZO.

**Table S1** The XPS O1s peak fitting results of  $\text{I}_{0.18}\text{Z}_{0.82}\text{O}$  and  $\text{I}_{0.18}\text{Z}_{0.82}\text{O}/\text{Ga}_2\text{O}_3$ .

| Materials                                                      | M-O (Stoichiometric) (%) | M-O (Oxygen Deficient) (%) |
|----------------------------------------------------------------|--------------------------|----------------------------|
| $\text{I}_{0.18}\text{Z}_{0.82}\text{O}$                       | 51                       | 49                         |
| $\text{I}_{0.18}\text{Z}_{0.82}\text{O}/\text{Ga}_2\text{O}_3$ | 38                       | 62                         |
